# Supplementary material for: Novel Genetic and Molecular Pathways in Pulmonary Arterial Hypertension Associated with Connective Tissue Disease
Source: MDPI journal article supplement (doi:10.3390/cells10061488), 2021-06-13
Supplement: s1 [file s1]

**Table S1. Spanish Registry of Pulmonary Arterial Hypertension Centers and Investigators**

|                                                                                          |                        |
|------------------------------------------------------------------------------------------|------------------------|
| Hospital Universitario 12 de Octubre - Madrid (Madrid)                                   | P. Escribano           |
| Hospital Universitario y Politécnico La Fe - Valencia (Valencia)                         | R. López<br>J. Rueda   |
| Hospital Universitario Insular de Gran Canaria - Las Palmas de Gran Canaria (Las Palmas) | F. Guerra              |
| Hospital Universitario Central de Asturias - Oviedo (Asturias)                           | P. Bedate              |
| Hospital Universitario Marqués de Valdecilla - Santander (Cantabria)                     | A. Martínez            |
| Hospital Universitario A Coruña - A Coruña (A Coruña)                                    | I. Otero               |
| Hospital General Universitario de Valencia - Valencia (Valencia)                         | G. Juan                |
| Hospital Universitario Vall d'Hebrón - Barcelona (Barcelona)                             | A. Román               |
| Hospital Universitario Virgen del Rocío - Sevilla (Sevilla)                              | F. García<br>T. Elías  |
| Hospital Universitario Puerta de Hierro - Majadahonda - Majadahonda (Madrid)             | J. Segovia             |
| Hospital Universitario Miguel Servet - Zaragoza (Zaragoza)                               | J. Domingo<br>M. López |
| Hospital Virgen de la Salud - Toledo (Toledo)                                            | M. Lázaro              |
| Hospital Universitario Son Espases - Palma de Mallorca (Islas Baleares)                  | E. Sala                |
| Hospital Universitario Clínic de Barcelona - Barcelona (Barcelona)                       | J. Barbera             |
| Hospital Universitario La Paz - Madrid (Madrid)                                          | S. Alcolea             |
| Hospital El Bierzo - Ponferrada (León)                                                   | J. Ortiz               |
| Hospital Universitario Basurto - Bilbao (Bilbao)                                         | F. Mazo                |
| Hospital General Universitario Los Arcos del Mar Menor - San Javier (Murcia)             | F. Martínez            |
| Hospitales Universitarios Vall d'Hebron - Sant Pau - Barcelona (Barcelona)               | L. Dos                 |
| Hospital Universitario de Canarias - San Cristobal de la Laguna (Santa Cruz de Tenerife) | A. Lara                |
| Hospital General Universitario de Alicante - Alicante (Alicante)                         | J. Gil                 |
| Hospital del Mar - Barcelona (Barcelona)                                                 | L. Molina              |
| Hospital Universitario Ramón y Cajal - Madrid (Madrid)                                   | E. Garrido-Lestache    |
| Hospital Universitario Fundación Jiménez Díaz - Madrid (Madrid)                          | I. Hernández           |
